# Supplementary material for: Robust induction of interferon and interferon-stimulated gene expression by influenza B/Yamagata lineage virus infection of A549 cells
Source: PubMed Central journal article supplement (PMC7141683; doi:10.1371/journal.pone.0231039), 2020-04-08

Fig 1.C

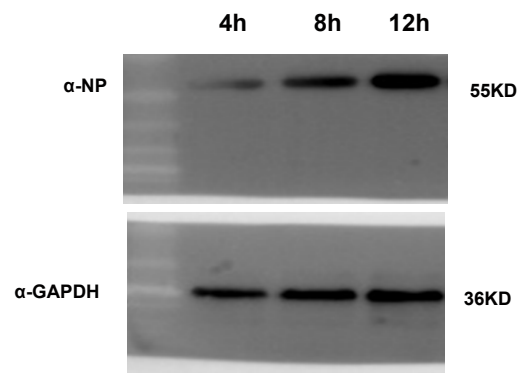

Fig 5.A

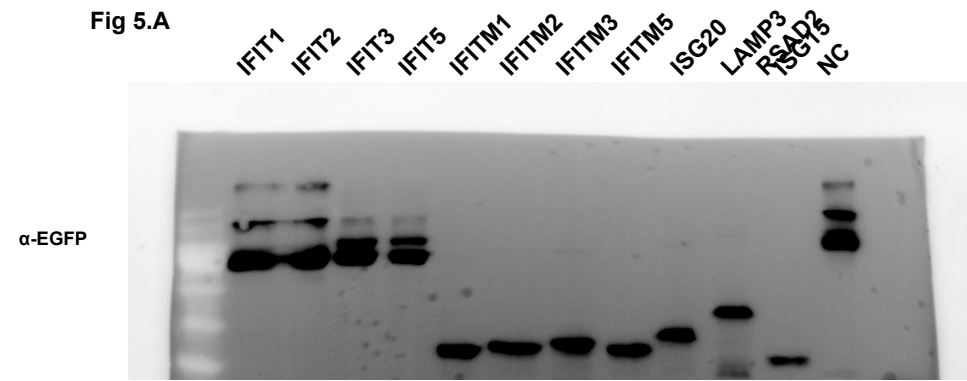

Fig S1.C

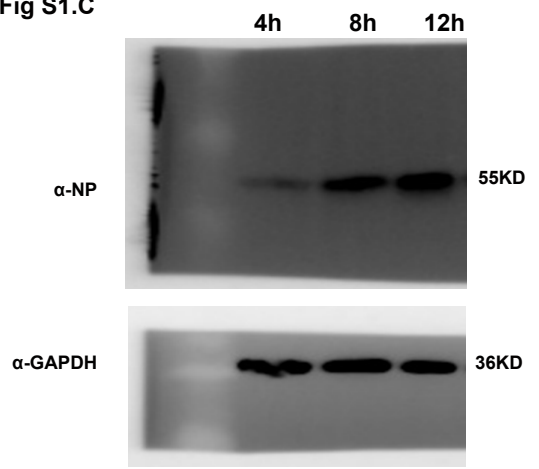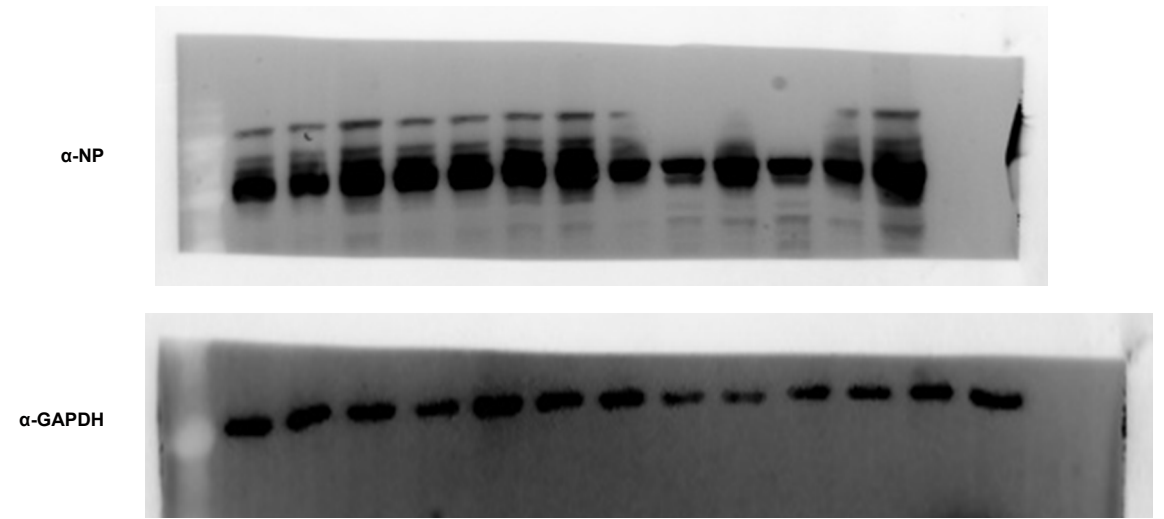

Supplement: pone.0231039.s006.pdf [file pone.0231039.s006.pdf]
